# Supplementary material for: Livestock Origin for a Human Pandemic Clone of Community-Associated Methicillin-Resistant Staphylococcus aureus
Source: PubMed Central journal article supplement — mBio. 2013 Aug 13;4(4):e00356-13. doi: 10.1128/mBio.00356-13 (PMC3747577; doi:10.1128/mbio.00356-13), 2013-08-13
Supplement: mbo004131575st4.pdf [file mbo004131575st4.pdf]

**Table S4. Assembly metrics for genome sequences included in the study (BWA reference-based)**

| <b>Study ID</b> | <b>Number of reads mapped</b> | <b>Mean fold-coverage</b> | <b>Coverage standard deviation</b> | <b>Mean mapping quality</b> | <b>Mapping quality standard deviation</b> |
|-----------------|-------------------------------|---------------------------|------------------------------------|-----------------------------|-------------------------------------------|
| 1_2008          | 12,042,010                    | 138.02                    | 70.70                              | 58.94                       | 4.80                                      |
| 2_2000          | 2,466,640                     | 28.03                     | 13.63                              | 59.48                       | 3.37                                      |
| 3_2008          | 1,455,281                     | 16.66                     | 10.22                              | 59.36                       | 3.75                                      |
| 4_2005          | 2,805,626                     | 31.86                     | 15.74                              | 59.48                       | 3.37                                      |
| 5_2003          | 1,713,389                     | 19.61                     | 11.68                              | 59.45                       | 3.49                                      |
| 6_2003          | 13,341,228                    | 152.91                    | 71.84                              | 58.13                       | 6.27                                      |
| 7_2003          | 9,042,216                     | 103.64                    | 52.31                              | 59.13                       | 4.35                                      |
| 8_2003          | 1,518,705                     | 17.25                     | 8.58                               | 59.49                       | 3.34                                      |
| 9_1987          | 7,598,972                     | 87.10                     | 48.63                              | 59.34                       | 3.80                                      |
| 10_1987         | 1,781,431                     | 20.39                     | 11.40                              | 59.40                       | 3.63                                      |
| 12_1987         | 10,432,587                    | 119.57                    | 61.29                              | 59.33                       | 3.83                                      |
| 13_2007_83      | 1,659,411                     | 18.99                     | 10.72                              | 59.45                       | 3.50                                      |
| 14_2006_58      | 2,863,735                     | 32.53                     | 16.07                              | 59.48                       | 3.38                                      |
| 15_2006_75      | 9,674,645                     | 110.89                    | 57.43                              | 58.30                       | 5.99                                      |
| 16_2005         | 10,016,939                    | 114.81                    | 53.16                              | 58.89                       | 4.90                                      |
| 17_2008         | 12,707,995                    | 145.65                    | 69.80                              | 59.02                       | 4.62                                      |
| 18_1997         | 2,124,376                     | 24.13                     | 11.94                              | 59.53                       | 3.22                                      |
| 19_2005         | 12,524,383                    | 143.55                    | 68.84                              | 57.88                       | 6.64                                      |
| 20_2005         | 1,771,987                     | 20.13                     | 10.36                              | 59.45                       | 3.46                                      |
| 21_2006         | 11,260,292                    | 129.06                    | 62.39                              | 56.71                       | 8.03                                      |
| 22_2007         | 8,338,728                     | 95.57                     | 44.14                              | 58.17                       | 6.21                                      |
| 23_2007         | 10,993,079                    | 126.00                    | 64.61                              | 58.45                       | 5.74                                      |
| 24_2009         | 10,687,499                    | 122.50                    | 59.68                              | 57.22                       | 7.49                                      |
| 25_2009         | 12,427,238                    | 142.44                    | 74.02                              | 58.71                       | 5.27                                      |
| 26_1999         | 1,861,107                     | 21.30                     | 11.56                              | 59.44                       | 3.52                                      |
| 27_1956         | 2,073,700                     | 23.55                     | 12.11                              | 59.49                       | 3.36                                      |
| 28_2005_91      | 2,460,821                     | 28.17                     | 14.85                              | 59.44                       | 3.52                                      |
| 29_1964         | 2,183,866                     | 25.00                     | 13.75                              | 59.44                       | 3.53                                      |
| 30_2005         | 11,921,292                    | 136.64                    | 63.30                              | 58.91                       | 4.85                                      |
| 31_2007         | 2,105,224                     | 24.10                     | 13.25                              | 59.41                       | 3.60                                      |
| 33_1958         | 8,439,921                     | 96.73                     | 47.59                              | 59.35                       | 3.77                                      |
| 34_1996         | 2,214,160                     | 25.15                     | 12.58                              | 59.49                       | 3.34                                      |
| 35_2007         | 1,078,139                     | 12.34                     | 7.14                               | 59.41                       | 3.60                                      |
| 36_1993_83      | 2,292,500                     | 26.04                     | 13.98                              | 59.47                       | 3.42                                      |
| 37_1993_91      | 11,407,335                    | 130.75                    | 66.10                              | 58.87                       | 4.94                                      |
| 38_1993_91      | 11,511,407                    | 131.94                    | 62.27                              | 59.11                       | 4.41                                      |
| 39_2007         | 1,176,997                     | 13.47                     | 7.82                               | 59.40                       | 3.64                                      |
| 40_2007         | 10,066,747                    | 115.38                    | 55.31                              | 57.61                       | 7.00                                      |
| 41_1996         | 2,773,926                     | 31.51                     | 15.61                              | 59.50                       | 3.33                                      |
| 42_2003         | 1,661,223                     | 18.87                     | 10.54                              | 59.48                       | 3.39                                      |
| 43_1980         | 3,952,648                     | 274.61                    | 167.84                             | 59.87                       | 1.73                                      |
| 44_2007         | 3,402,387                     | 236.38                    | 105.11                             | 59.91                       | 1.41                                      |
| 45_2011         | 2,218,785                     | 154.15                    | 73.62                              | 59.90                       | 1.54                                      |
| 46_2012         | 2,464,889                     | 171.25                    | 79.83                              | 59.92                       | 1.34                                      |
