# Supplementary figures and images for: Livestock Origin for a Human Pandemic Clone of Community-Associated Methicillin-Resistant Staphylococcus aureus
Source: PubMed Central journal article supplement — mBio. 2013 Aug 13;4(4):e00356-13. doi: 10.1128/mBio.00356-13 (PMC3747577; doi:10.1128/mbio.00356-13), 2013-08-13

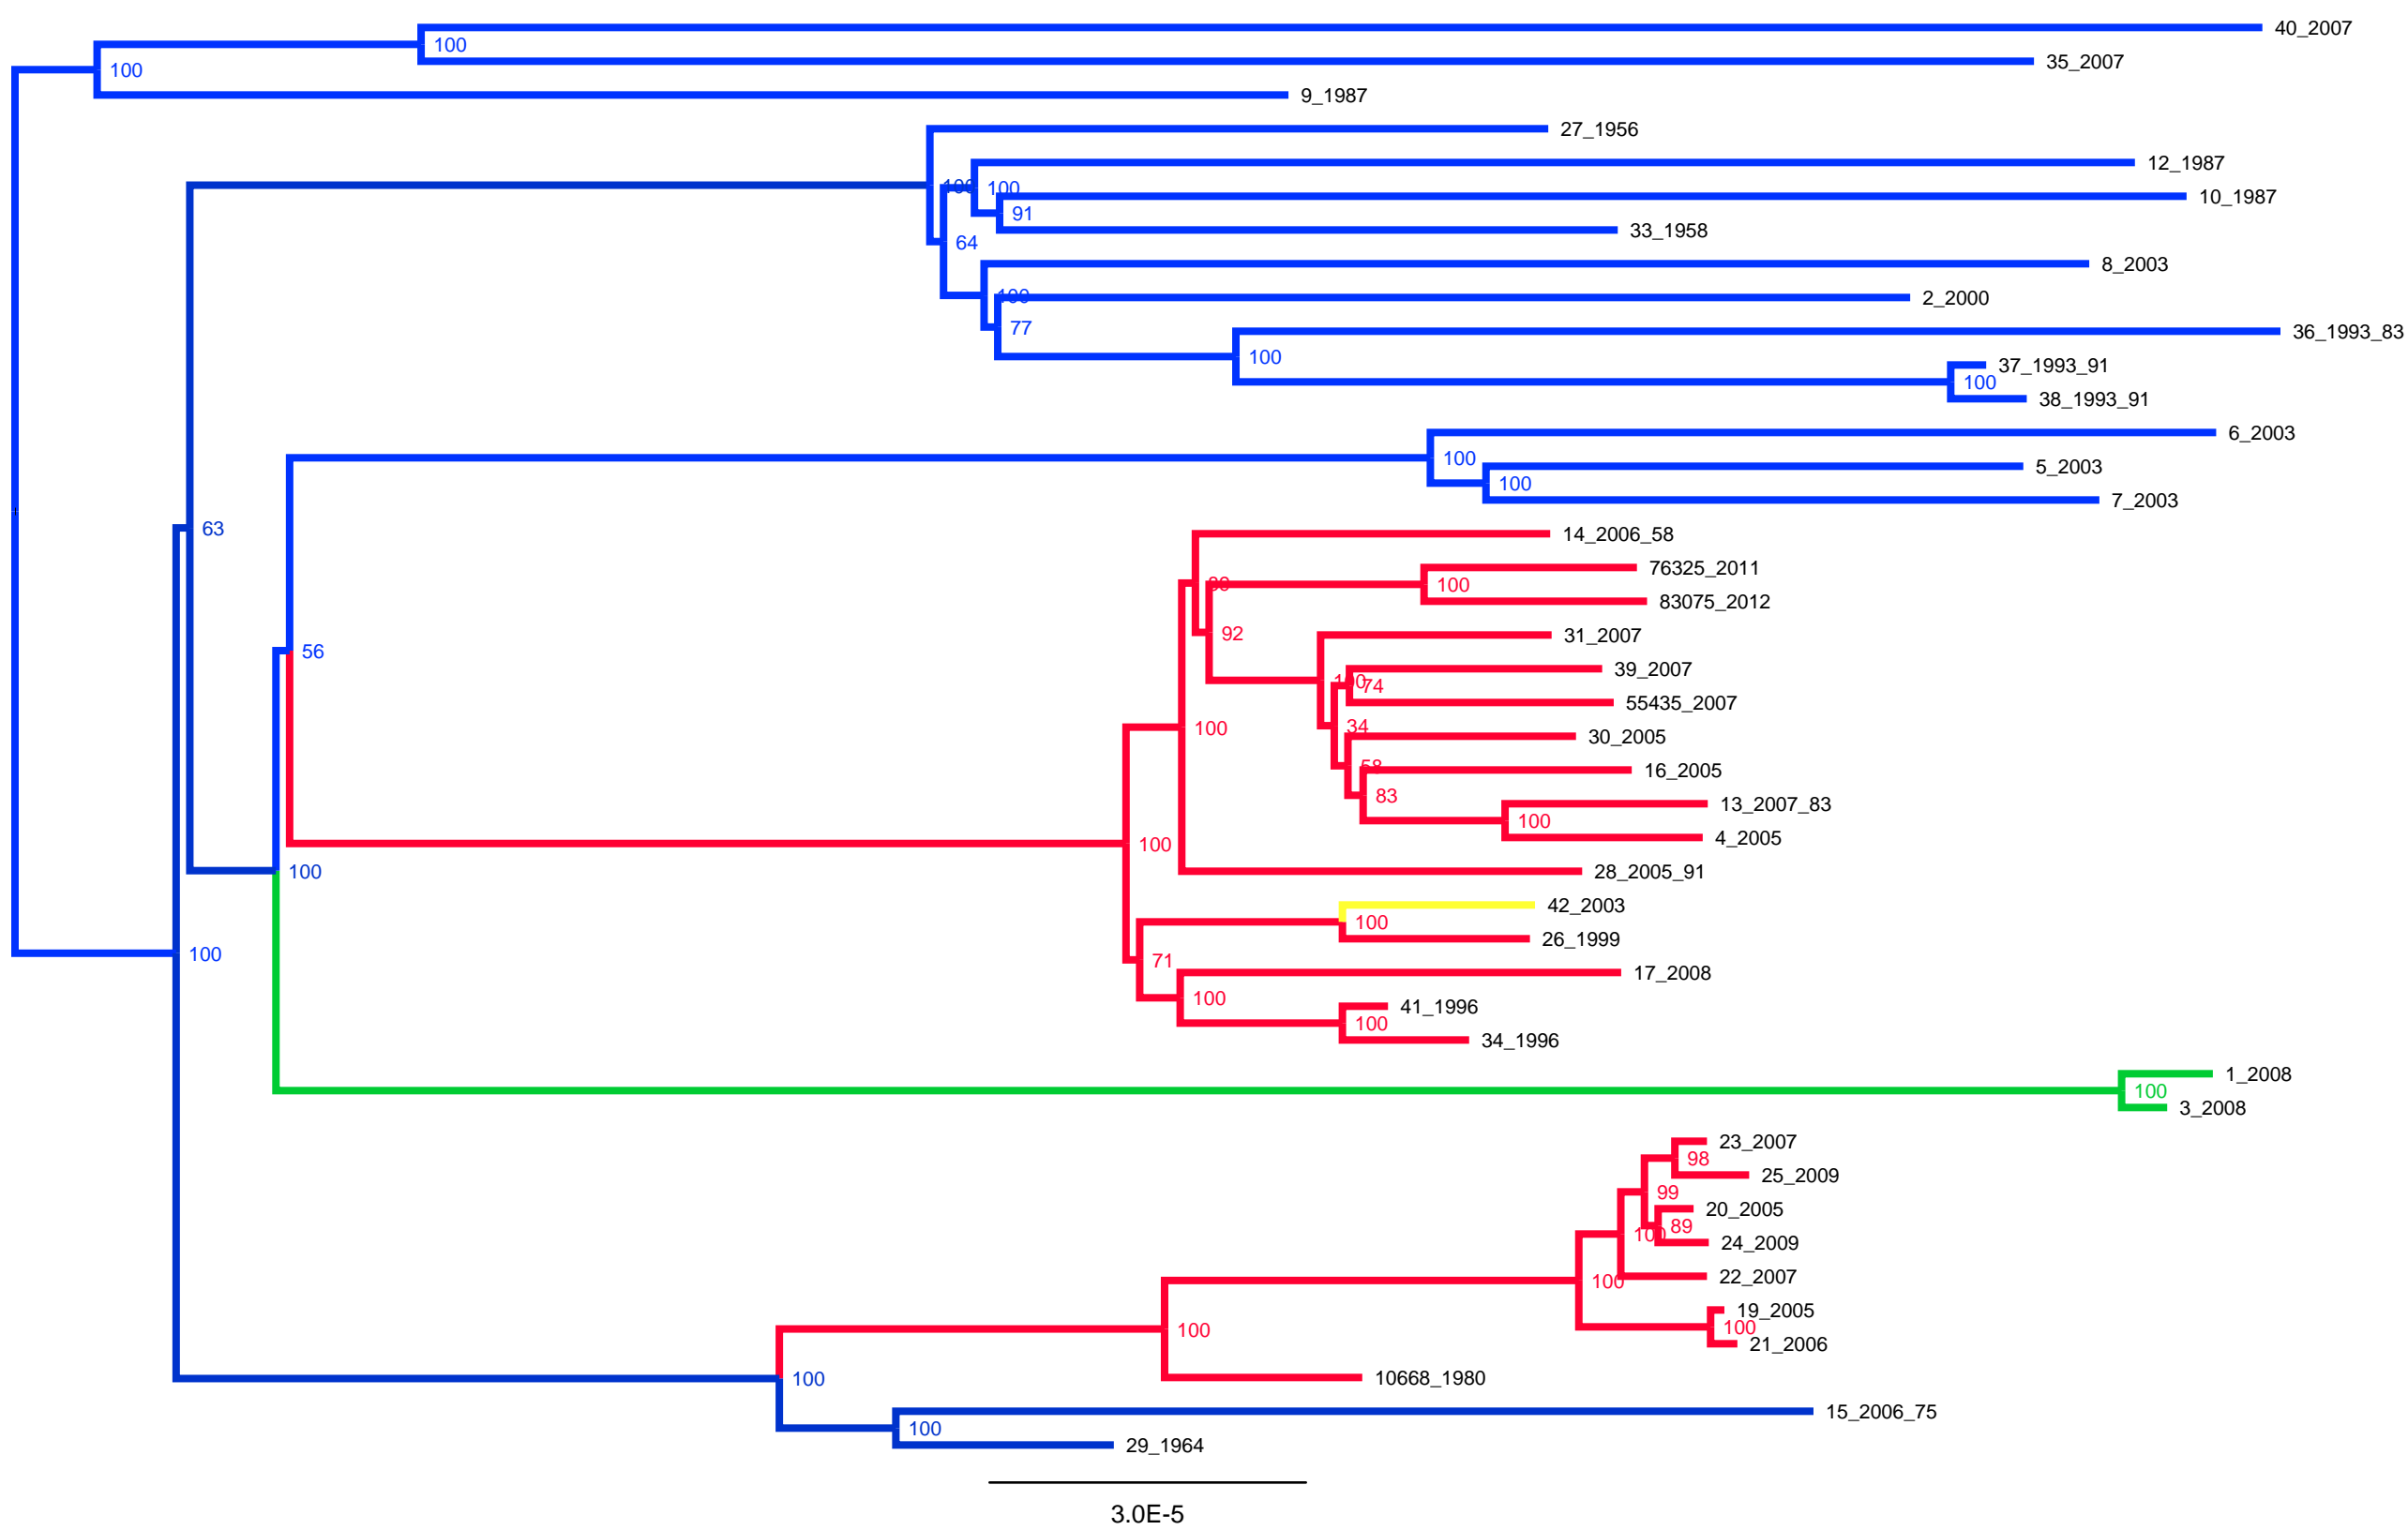

Supplement: mbo004131575sf01.pdf [file mbo004131575sf01.pdf]
